# Supplementary material for: Exploring the Optimal Range of Blood Pressure in Elderly Sepsis Patients: A Retrospective Study Based on MIMIC-IV Data
Source: Research Square preprint supplement (doi:10.21203/rs.3.rs-6011063/v1), 2025-02-18
Supplement: Supplementary file 1 [file 30379ef317b4a84070bbda2e.docx]

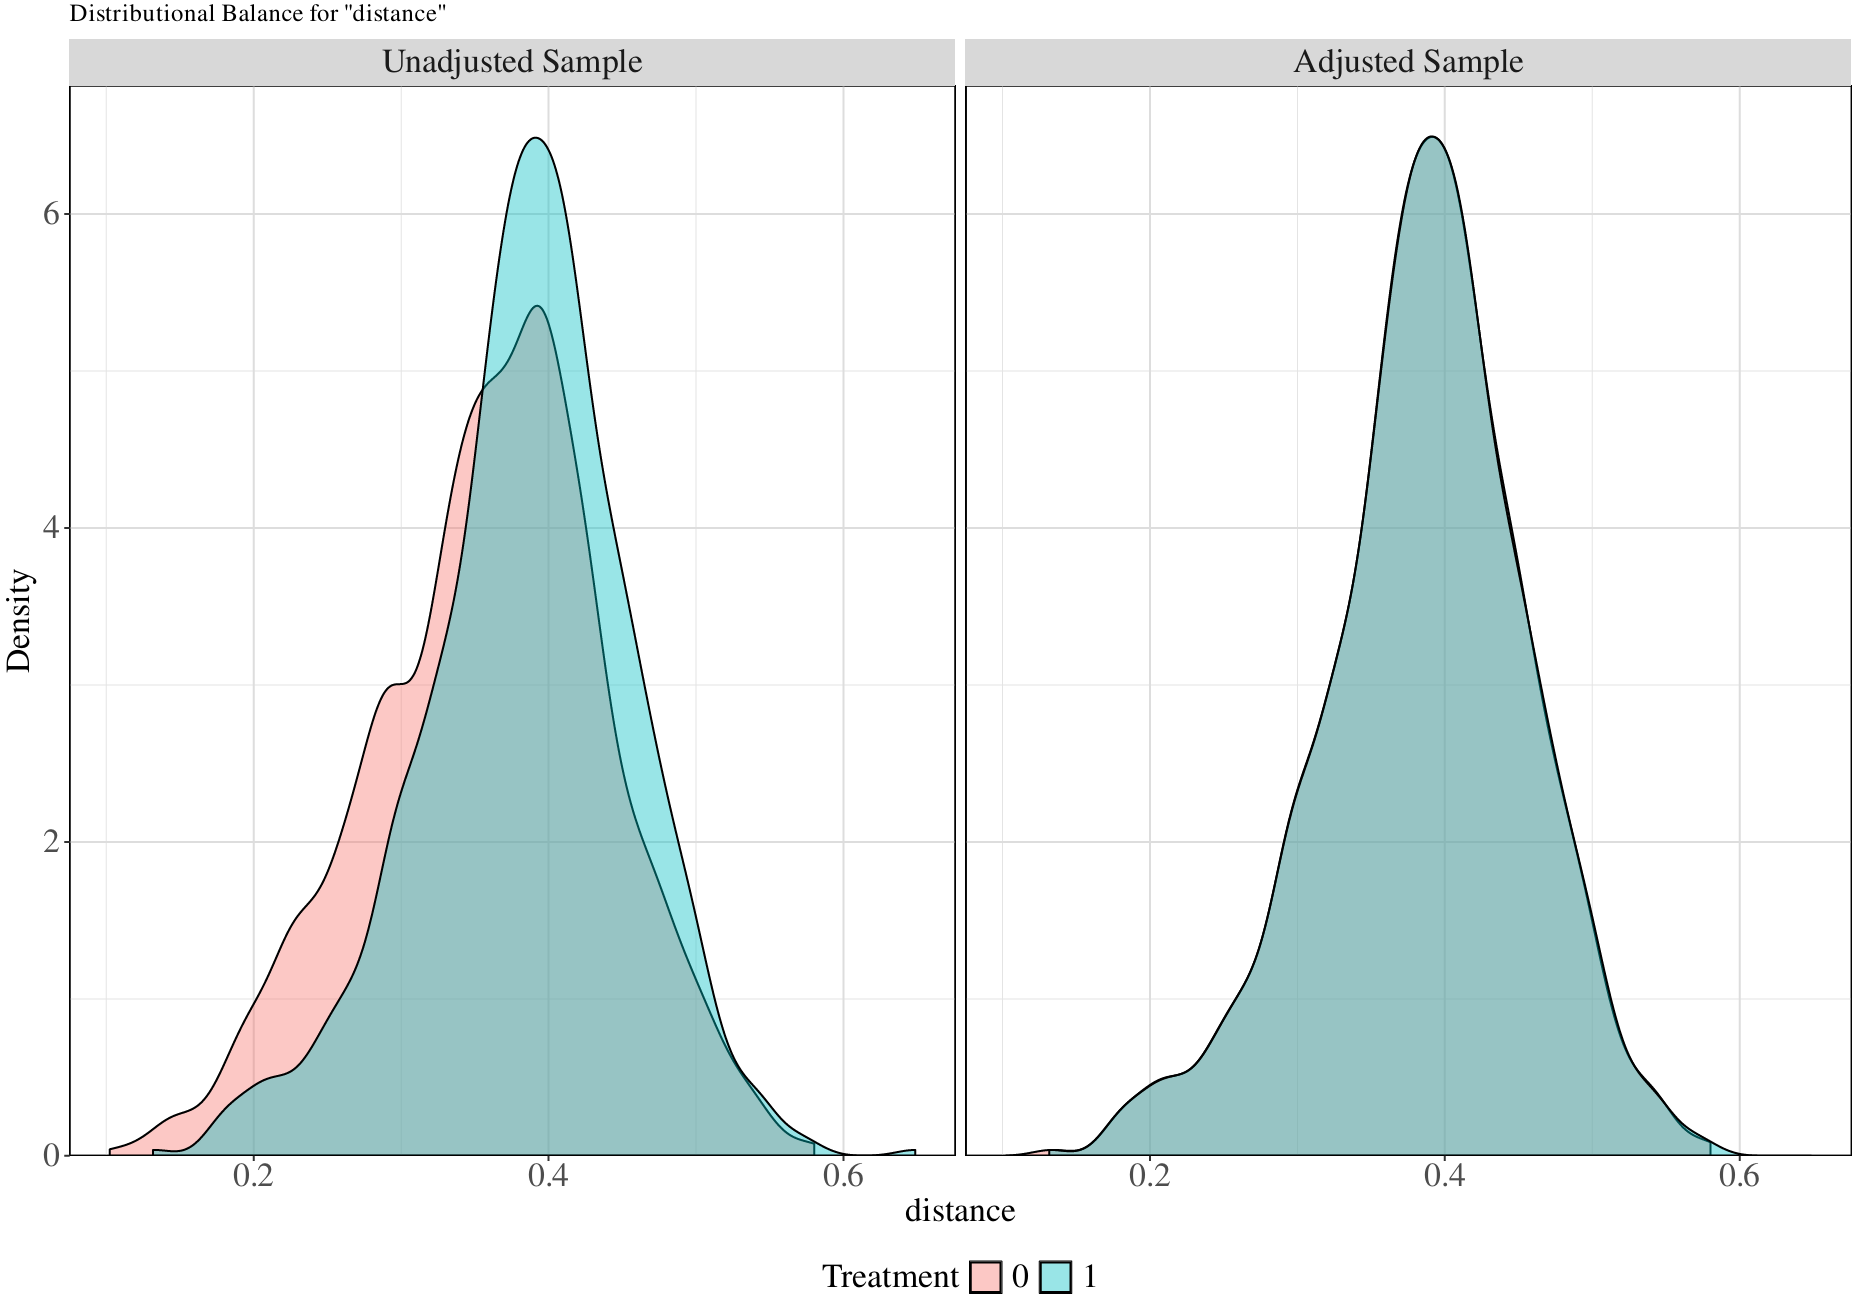

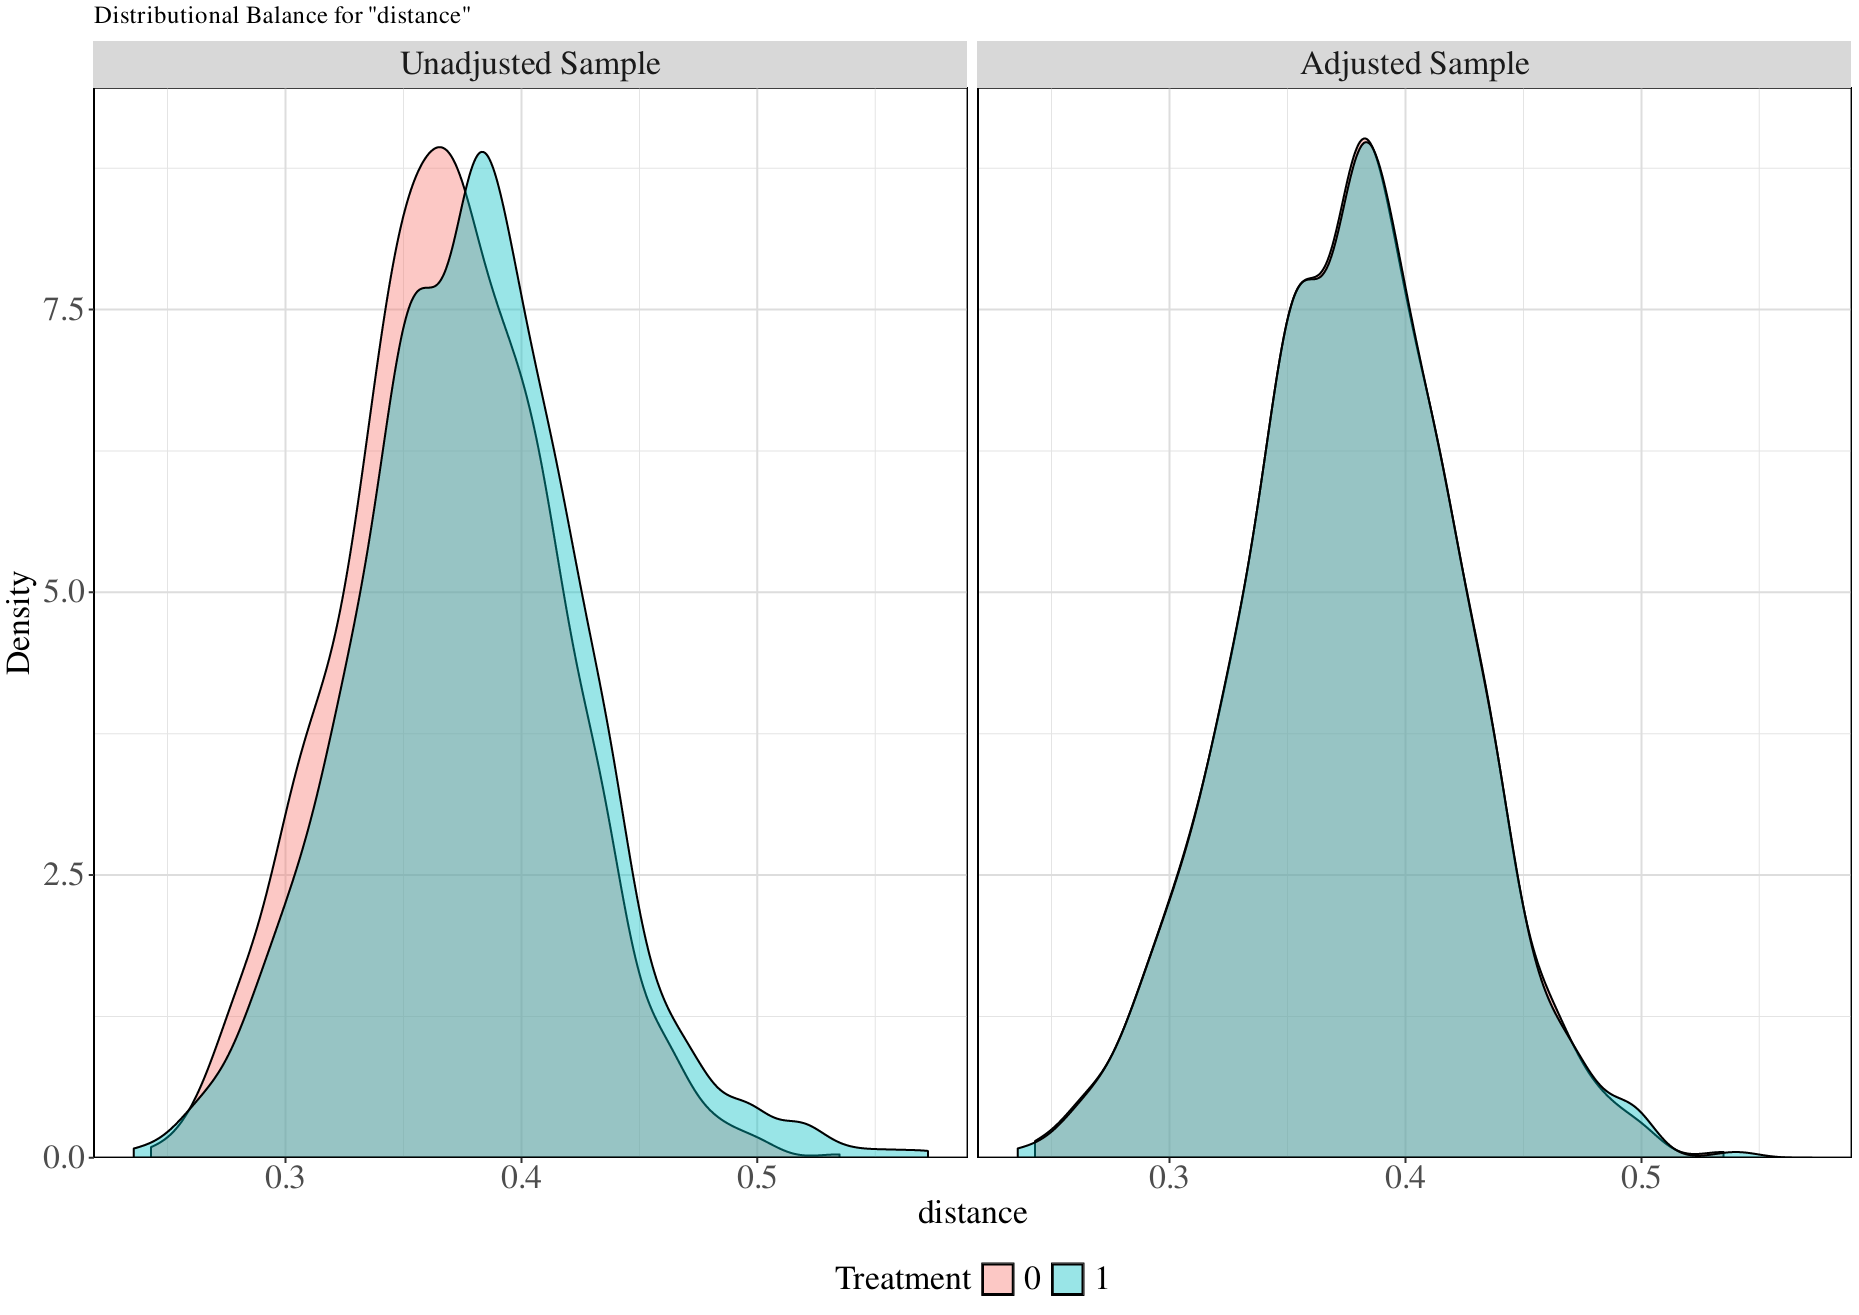


**C**

**B**

**A**


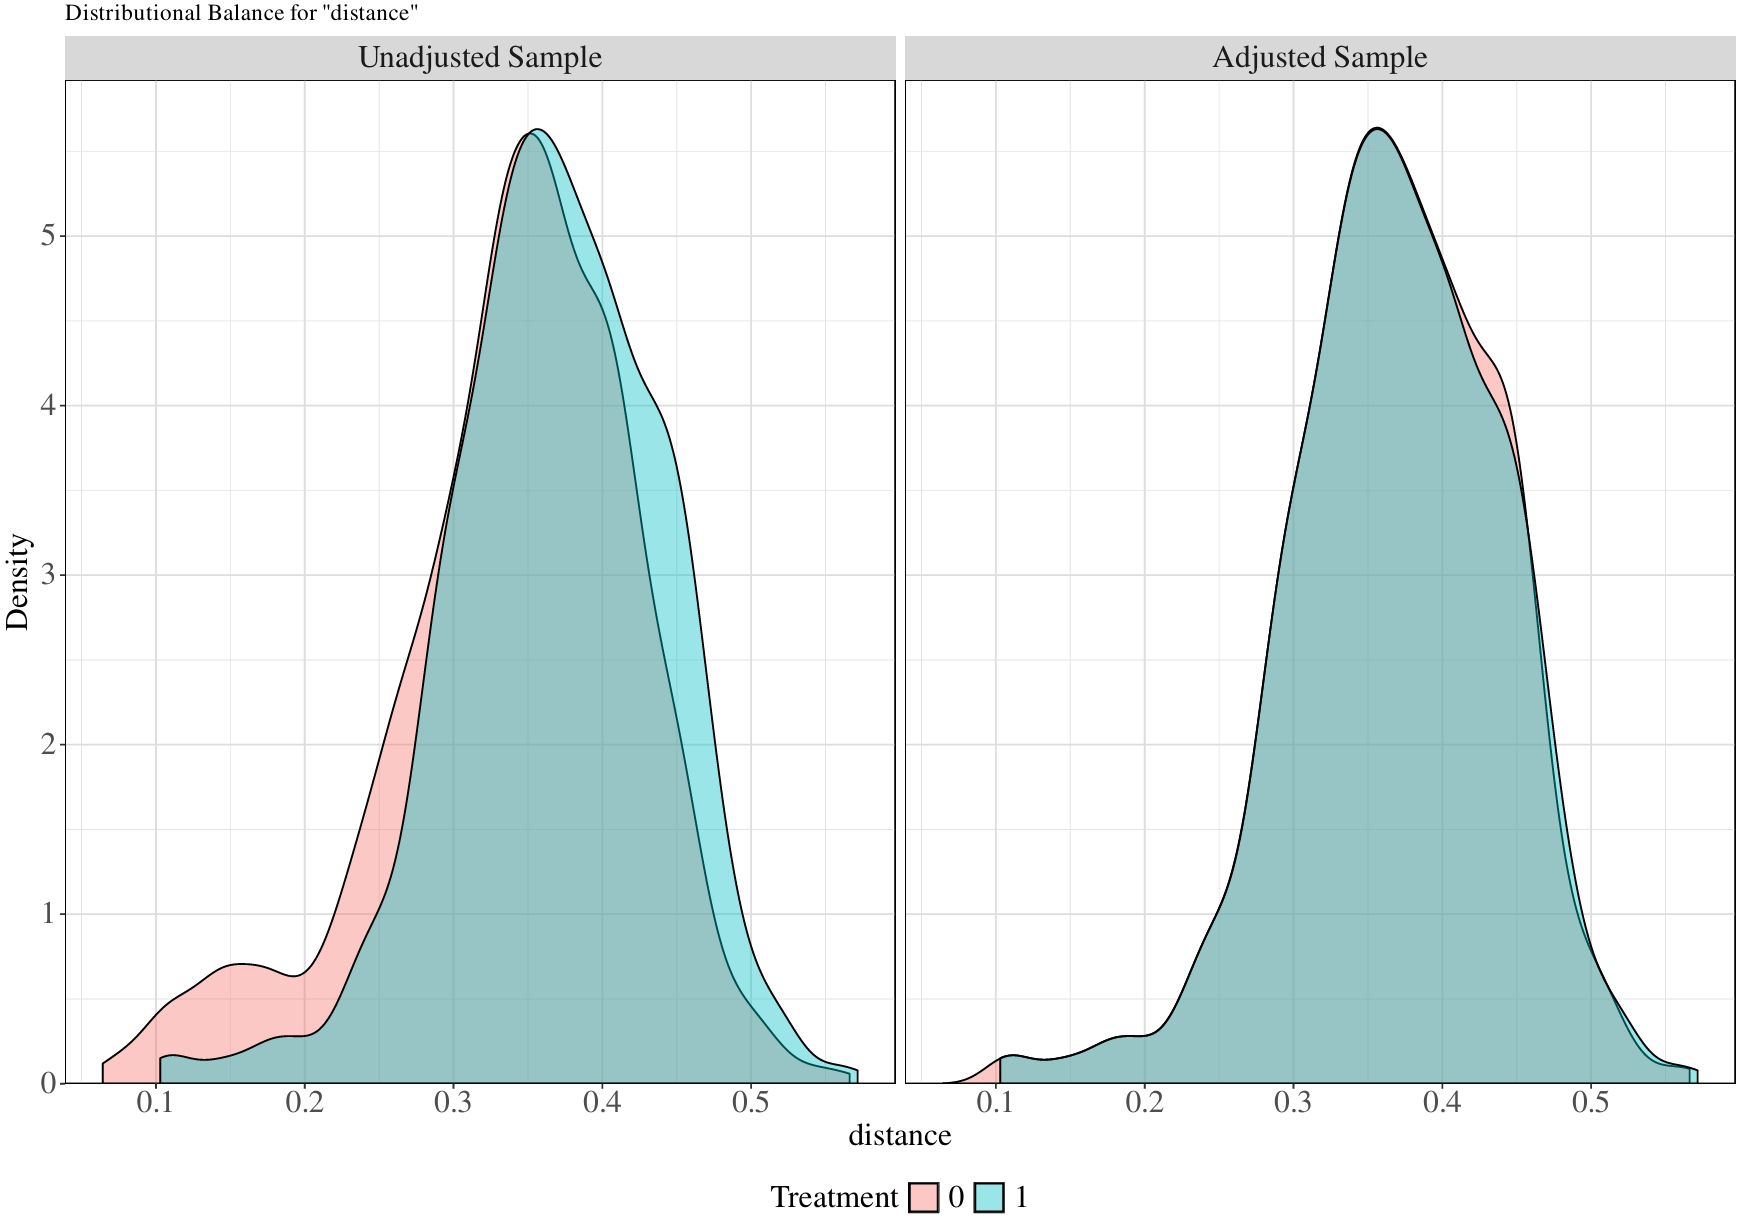


Appendix FIGURE 2

Distributional balance of propensity scores in unmatched and matched samples. 0 = patients outside the optimal blood pressure; 1 = patients within the optimal blood pressure.
