# Supplementary material for: Exploring the Optimal Range of Blood Pressure in Elderly Sepsis Patients: A Retrospective Study Based on MIMIC-IV Data
Source: Research Square preprint supplement (doi:10.21203/rs.3.rs-6011063/v1), 2025-02-18
Supplement: Supplementary file 2 [file 5de2a00e4625ae18e1139db3.docx]

### The results of the subgroup analysis of the optimal range of systolic blood pressure

| Variables | n (%) | 0 | 1 | HR (95%CI) | *P* | P for interaction |
| --- | --- | --- | --- | --- | --- | --- |
|
| All patients | 2253 (100.00) | 381/1421 | 189/832 | 0.76 (0.64 ~ 0.91) | **0.002** |  |
| Gender |  |  |  |  |  | 0.104 |
| Female | 1086 (48.20) | 197/690 | 92/396 | 0.63 (0.49 ~ 0.82) | **<.001** |  |
| Male | 1167 (51.80) | 184/731 | 97/436 | 0.85 (0.66 ~ 1.09) | 0.202 |  |
| Myocardial infarct |  |  |  |  |  | 0.865 |
| NO | 1639 (72.75) | 269/1062 | 130/577 | 0.76 (0.61 ~ 0.95) | **0.014** |  |
| YES | 614 (27.25) | 112/359 | 59/255 | 0.82 (0.59 ~ 1.13) | 0.226 |  |
| Congestive heart failure |  |  |  |  |  | 0.352 |
| NO | 1296 (57.52) | 202/830 | 97/466 | 0.72 (0.56 ~ 0.92) | **0.010** |  |
| YES | 957 (42.48) | 179/591 | 92/366 | 0.83 (0.65 ~ 1.08) | 0.163 |  |
| Peripheral vascular disease |  |  |  |  |  | 0.801 |
| NO | 1835 (81.45) | 313/1145 | 158/690 | 0.75 (0.62 ~ 0.91) | **0.004** |  |
| YES | 418 (18.55) | 68/276 | 31/142 | 0.84 (0.52 ~ 1.36) | 0.485 |  |
| Cerebrovascular disease |  |  |  |  |  | 0.252 |
| NO | 1903 (84.47) | 304/1169 | 163/734 | 0.79 (0.65 ~ 0.96) | **0.017** |  |
| YES | 350 (15.53) | 77/252 | 26/98 | 0.66 (0.41 ~ 1.06) | 0.085 |  |
| Dementia |  |  |  |  |  | 0.005 |
| NO | 2103 (93.34) | 355/1332 | 163/771 | 0.70 (0.58 ~ 0.85) | **<.001** |  |
| YES | 150 (6.66) | 26/89 | 26/61 | 1.49 (0.82 ~ 2.73) | 0.192 |  |
| Chronic pulmonary disease |  |  |  |  |  | 0.168 |
| NO | 1588 (70.48) | 264/1002 | 124/586 | 0.69 (0.56 ~ 0.86) | **0.001** |  |
| YES | 665 (29.52) | 117/419 | 65/246 | 0.88 (0.64 ~ 1.21) | 0.424 |  |
| Rheumatic disease |  |  |  |  |  | 0.686 |
| NO | 2158 (95.78) | 358/1351 | 181/807 | 0.76 (0.63 ~ 0.91) | **0.003** |  |
| YES | 95 (4.22) | 23/70 | 8/25 | 1.05 (0.31 ~ 3.59) | 0.936 |  |
| Peptic ulcer disease |  |  |  |  |  | 0.756 |
| NO | 2174 (96.49) | 363/1373 | 182/801 | 0.77 (0.64 ~ 0.92) | **0.004** |  |
| YES | 79 (3.51) | 18/48 | 7/31 | 0.58 (0.21 ~ 1.62) | 0.299 |  |
| Mild liver disease |  |  |  |  |  | 0.787 |
| NO | 2095 (92.99) | 329/1313 | 170/782 | 0.76 (0.63 ~ 0.92) | **0.005** |  |
| YES | 158 (7.01) | 52/108 | 19/50 | 0.83 (0.47 ~ 1.47) | 0.523 |  |
| Diabetes without complications |  |  |  |  |  | 0.021 |
| NO | 1674 (74.30) | 281/1058 | 127/616 | 0.65 (0.52 ~ 0.80) | **<.001** |  |
| YES | 579 (25.70) | 100/363 | 62/216 | 0.96 (0.69 ~ 1.35) | 0.826 |  |
| Diabetes with complications |  |  |  |  |  | 0.375 |
| NO | 2061 (91.48) | 350/1299 | 169/762 | 0.75 (0.62 ~ 0.90) | **0.002** |  |
| YES | 192 (8.52) | 31/122 | 20/70 | 1.07 (0.59 ~ 1.93) | 0.832 |  |
| Paraplegia |  |  |  |  |  | 0.560 |
| NO | 2169 (96.27) | 355/1357 | 181/812 | 0.75 (0.62 ~ 0.90) | **0.002** |  |
| YES | 84 (3.73) | 26/64 | 8/20 | 0.70 (0.26 ~ 1.87) | 0.474 |  |
| Renal disease |  |  |  |  |  | 0.819 |
| NO | 1564 (69.42) | 244/980 | 125/584 | 0.76 (0.61 ~ 0.95) | **0.015** |  |
| YES | 689 (30.58) | 137/441 | 64/248 | 0.73 (0.53 ~ 0.99) | **0.043** |  |
| Malignant cancer |  |  |  |  |  | 0.889 |
| NO | 1965 (87.22) | 307/1236 | 152/729 | 0.76 (0.62 ~ 0.93) | **0.007** |  |
| YES | 288 (12.78) | 74/185 | 37/103 | 0.92 (0.61 ~ 1.41) | 0.716 |  |
| Severe liver disease |  |  |  |  |  | 0.511 |
| NO | 2211 (98.14) | 370/1398 | 180/813 | 0.76 (0.64 ~ 0.91) | **0.003** |  |
| YES | 42 (1.86) | 11/23 | 9/19 | 0.42 (0.06 ~ 2.91) | 0.379 |  |
| Metastatic solid tumor |  |  |  |  |  | 0.146 |
| NO | 2155 (95.65) | 340/1357 | 171/798 | 0.79 (0.65 ~ 0.95) | **0.013** |  |
| YES | 98 (4.35) | 41/64 | 18/34 | 0.70 (0.37 ~ 1.31) | 0.261 |  |
| Acquired immune deficiency syndrome |  |  |  |  |  |  |
| NO | 2252 (99.96) | 380/1420 | 189/832 | 0.76 (0.64 ~ 0.91) | **0.003** |  |
| YES | 1 (0.04) | 1/1 | 0/0 |  |  |  |
| Age |  |  |  |  |  | 0.863 |
| <82 | 1126 (49.98) | 166/718 | 73/408 | 0.78 (0.59 ~ 1.03) | 0.083 |  |
| >=82 | 1127 (50.02) | 215/703 | 116/424 | 0.75 (0.59 ~ 0.94) | **0.013** |  |
| Charlson comorbidity index |  |  |  |  |  | 0.610 |
| <=6 | 750 (33.29) | 84/467 | 38/283 | 0.73 (0.49 ~ 1.09) | 0.121 |  |
| >6 | 1503 (66.71) | 297/954 | 151/549 | 0.78 (0.64 ~ 0.95) | **0.014** |  |
| Heart Rate |  |  |  |  |  | 0.298 |
| <81 | 1094 (48.56) | 148/708 | 77/386 | 0.88 (0.66 ~ 1.17) | 0.379 |  |
| >=81 | 1159 (51.44) | 233/713 | 112/446 | 0.72 (0.57 ~ 0.91) | **0.005** |  |
| Respiratory Rate |  |  |  |  |  | 0.242 |
| <19 | 916 (40.66) | 122/574 | 61/342 | 0.89 (0.65 ~ 1.23) | 0.489 |  |
| >=19 | 1337 (59.34) | 259/847 | 128/490 | 0.73 (0.58 ~ 0.90) | **0.004** |  |
| Temperature |  |  |  |  |  | 0.881 |
| <36 8 | 1017 (45.14) | 178/623 | 90/394 | 0.77 (0.59 ~ 1.00) | 0.052 |  |
| >=36 8 | 1236 (54.86) | 203/798 | 99/438 | 0.82 (0.64 ~ 1.04) | 0.106 |  |
| Pulse oxygen saturation |  |  |  |  |  | 0.997 |
| <97 | 761 (33.78) | 119/474 | 59/287 | 0.75 (0.54 ~ 1.03) | 0.077 |  |
| >=97 | 1492 (66.22) | 262/947 | 130/545 | 0.77 (0.62 ~ 0.95) | **0.017** |  |
| White blood cell |  |  |  |  |  | 0.900 |
| <9 8 | 1120 (49.71) | 152/704 | 72/416 | 0.74 (0.56 ~ 0.99) | **0.043** |  |
| >=9 8 | 1133 (50.29) | 229/717 | 117/416 | 0.77 (0.62 ~ 0.97) | **0.029** |  |
| Hemoglobin |  |  |  |  |  | 0.818 |
| <9 85 | 1111 (49.31) | 196/698 | 101/413 | 0.74 (0.58 ~ 0.94) | **0.016** |  |
| >=9 85 | 1142 (50.69) | 185/723 | 88/419 | 0.79 (0.61 ~ 1.02) | 0.070 |  |
| Platelet |  |  |  |  |  | 0.881 |
| <193 | 1125 (49.93) | 186/679 | 107/446 | 0.80 (0.63 ~ 1.02) | 0.077 |  |
| >=193 | 1128 (50.07) | 195/742 | 82/386 | 0.74 (0.57 ~ 0.96) | **0.024** |  |
| Creatinine |  |  |  |  |  | 0.893 |
| <1 1 | 1029 (45.67) | 142/644 | 71/385 | 0.75 (0.56 ~ 1.00) | 0.051 |  |
| >=1 1 | 1224 (54.33) | 239/777 | 118/447 | 0.73 (0.59 ~ 0.92) | **0.008** |  |
| Blood urea nitrogen |  |  |  |  |  | 0.246 |
| <26 | 1107 (49.13) | 150/691 | 64/416 | 0.62 (0.46 ~ 0.85) | **0.002** |  |
| >=26 | 1146 (50.87) | 231/730 | 125/416 | 0.81 (0.65 ~ 1.01) | 0.057 |  |
| Potassium |  |  |  |  |  | 0.287 |
| <4 1 | 1001 (44.43) | 166/644 | 75/357 | 0.70 (0.53 ~ 0.93) | **0.013** |  |
| >=4 1 | 1252 (55.57) | 215/777 | 114/475 | 0.83 (0.66 ~ 1.04) | 0.112 |  |
| Sodium |  |  |  |  |  | 0.098 |
| <139 | 959 (42.57) | 166/586 | 69/373 | 0.61 (0.46 ~ 0.82) | **<.001** |  |
| >=139 | 1294 (57.43) | 215/835 | 120/459 | 0.90 (0.71 ~ 1.13) | 0.354 |  |
| Chloride |  |  |  |  |  | 0.206 |
| <103 | 1003 (44.52) | 151/611 | 77/392 | 0.66 (0.50 ~ 0.88) | **0.005** |  |
| >=103 | 1250 (55.48) | 230/810 | 112/440 | 0.86 (0.68 ~ 1.08) | 0.190 |  |
| Calcium |  |  |  |  |  | 0.256 |
| <8 4 | 979 (43.45) | 218/611 | 104/368 | 0.65 (0.51 ~ 0.83) | **<.001** |  |
| >=8 4 | 1274 (56.55) | 163/810 | 85/464 | 0.85 (0.65 ~ 1.12) | 0.252 |  |
| Glucose |  |  |  |  |  | 0.771 |
| <118 | 1087 (48.25) | 133/669 | 68/418 | 0.78 (0.58 ~ 1.05) | 0.099 |  |
| >=118 | 1166 (51.75) | 248/752 | 121/414 | 0.74 (0.60 ~ 0.93) | **0.009** |  |
| Bicarbonate |  |  |  |  |  | 0.047 |
| <25 | 950 (42.17) | 226/613 | 127/337 | 0.86 (0.69 ~ 1.08) | 0.205 |  |
| >=25 | 1303 (57.83) | 155/808 | 62/495 | 0.63 (0.47 ~ 0.85) | **0.003** |  |
| Lactate |  |  |  |  |  | 0.246 |
| <1 7 | 1056 (46.87) | 155/692 | 71/364 | 0.94 (0.70 ~ 1.26) | 0.694 |  |
| >=1 7 | 1197 (53.13) | 226/729 | 118/468 | 0.72 (0.57 ~ 0.90) | **0.004** |  |
| Sequential Organ Failure Assessment |  |  |  |  |  | 0.797 |
| <5 | 971 (43.10) | 112/639 | 42/332 | 0.72 (0.50 ~ 1.03) | 0.075 |  |
| >=5 | 1282 (56.90) | 269/782 | 147/500 | 0.77 (0.63 ~ 0.95) | **0.014** |  |
| Glasgow Coma Scale |  |  |  |  |  | 0.583 |
| <15 | 337 (14.96) | 75/230 | 27/107 | 0.64 (0.41 ~ 1.02) | 0.060 |  |
| 15 | 1916 (85.04) | 306/1191 | 162/725 | 0.79 (0.65 ~ 0.96) | **0.017** |  |
| HR: Hazard Ratio, CI: Confidence Interval, 0: SBP out of (108–118), 1: SBP in (108–118). | | | | | | |
