# Supplementary material for: Exploring the Optimal Range of Blood Pressure in Elderly Sepsis Patients: A Retrospective Study Based on MIMIC-IV Data
Source: Research Square preprint supplement (doi:10.21203/rs.3.rs-6011063/v1), 2025-02-18
Supplement: Supplementary file 3 [file 7f05befbbfc31dd75511c57d.docx]

### The results of the subgroup analysis of the optimal range of diastolic blood pressure

| Variables | n (%) | 0 | 1 | HR (95%CI) | *P* | P for interaction |
| --- | --- | --- | --- | --- | --- | --- |
|
| All patients | 2253 (100.00) | 379/1414 | 191/839 | 0.79 (0.67 ~ 0.95) | **0.010** |  |
| Gender |  |  |  |  |  | 0.049 |
| Female | 1086 (48.20) | 191/706 | 98/380 | 0.96 (0.75 ~ 1.22) | 0.721 |  |
| Male | 1167 (51.80) | 188/708 | 93/459 | 0.67 (0.52 ~ 0.87) | **0.002** |  |
| Myocardial infarct |  |  |  |  |  | 0.848 |
| NO | 1639 (72.75) | 266/1018 | 133/621 | 0.79 (0.64 ~ 0.97) | **0.025** |  |
| YES | 614 (27.25) | 113/396 | 58/218 | 0.84 (0.61 ~ 1.17) | 0.307 |  |
| Congestive heart failure |  |  |  |  |  | 0.138 |
| NO | 1296 (57.52) | 191/808 | 108/488 | 0.89 (0.70 ~ 1.13) | 0.332 |  |
| YES | 957 (42.48) | 188/606 | 83/351 | 0.68 (0.52 ~ 0.89) | **0.005** |  |
| Peripheral vascular disease |  |  |  |  |  | 0.307 |
| NO | 1835 (81.45) | 309/1135 | 162/700 | 0.76 (0.63 ~ 0.92) | **0.006** |  |
| YES | 418 (18.55) | 70/279 | 29/139 | 0.92 (0.58 ~ 1.47) | 0.726 |  |
| Cerebrovascular disease |  |  |  |  |  | 0.425 |
| NO | 1903 (84.47) | 308/1188 | 159/715 | 0.76 (0.62 ~ 0.92) | **0.004** |  |
| YES | 350 (15.53) | 71/226 | 32/124 | 0.85 (0.55 ~ 1.30) | 0.445 |  |
| Dementia |  |  |  |  |  | 0.908 |
| NO | 2103 (93.34) | 346/1320 | 172/783 | 0.79 (0.66 ~ 0.95) | **0.013** |  |
| YES | 150 (6.66) | 33/94 | 19/56 | 0.92 (0.50 ~ 1.70) | 0.782 |  |
| Chronic pulmonary disease |  |  |  |  |  | 0.062 |
| NO | 1588 (70.48) | 260/985 | 128/603 | 0.73 (0.59 ~ 0.90) | **0.004** |  |
| YES | 665 (29.52) | 119/429 | 63/236 | 1.03 (0.75 ~ 1.40) | 0.859 |  |
| Rheumatic disease |  |  |  |  |  | 0.565 |
| NO | 2158 (95.78) | 359/1354 | 180/804 | 0.78 (0.66 ~ 0.94) | **0.009** |  |
| YES | 95 (4.22) | 20/60 | 11/35 | 1.07 (0.43 ~ 2.65) | 0.890 |  |
| Peptic ulcer disease |  |  |  |  |  | 0.399 |
| NO | 2174 (96.49) | 366/1362 | 179/812 | 0.78 (0.65 ~ 0.93) | **0.006** |  |
| YES | 79 (3.51) | 13/52 | 12/27 | 2.95 (1.01 ~ 8.60) | **0.048** |  |
| Mild liver disease |  |  |  |  |  | 0.573 |
| NO | 2095 (92.99) | 340/1324 | 159/771 | 0.77 (0.63 ~ 0.93) | **0.006** |  |
| YES | 158 (7.01) | 39/90 | 32/68 | 0.89 (0.52 ~ 1.51) | 0.662 |  |
| Diabetes without complications |  |  |  |  |  | 0.536 |
| NO | 1674 (74.30) | 273/1042 | 135/632 | 0.75 (0.61 ~ 0.92) | **0.007** |  |
| YES | 579 (25.70) | 106/372 | 56/207 | 0.83 (0.60 ~ 1.16) | 0.284 |  |
| Diabetes with complications |  |  |  |  |  | 0.117 |
| NO | 2061 (91.48) | 347/1296 | 172/765 | 0.75 (0.63 ~ 0.91) | **0.003** |  |
| YES | 192 (8.52) | 32/118 | 19/74 | 1.01 (0.55 ~ 1.85) | 0.986 |  |
| Paraplegia |  |  |  |  |  | 0.603 |
| NO | 2169 (96.27) | 356/1358 | 180/811 | 0.79 (0.66 ~ 0.94) | **0.009** |  |
| YES | 84 (3.73) | 23/56 | 11/28 | 1.25 (0.57 ~ 2.74) | 0.574 |  |
| Renal disease |  |  |  |  |  | 0.979 |
| NO | 1564 (69.42) | 243/984 | 126/580 | 0.80 (0.64 ~ 0.99) | **0.041** |  |
| YES | 689 (30.58) | 136/430 | 65/259 | 0.84 (0.62 ~ 1.13) | 0.250 |  |
| Malignant cancer |  |  |  |  |  | 0.804 |
| NO | 1965 (87.22) | 309/1241 | 150/724 | 0.81 (0.66 ~ 0.98) | **0.035** |  |
| YES | 288 (12.78) | 70/173 | 41/115 | 0.74 (0.49 ~ 1.11) | 0.144 |  |
| Severe liver disease |  |  |  |  |  | 0.528 |
| NO | 2211 (98.14) | 367/1389 | 183/822 | 0.78 (0.65 ~ 0.94) | **0.007** |  |
| YES | 42 (1.86) | 12/25 | 8/17 | 2.26 (0.41 ~ 12.41) | 0.348 |  |
| Metastatic solid tumor |  |  |  |  |  | 0.182 |
| NO | 2155 (95.65) | 344/1358 | 167/797 | 0.76 (0.63 ~ 0.92) | **0.004** |  |
| YES | 98 (4.35) | 35/56 | 24/42 | 0.76 (0.42 ~ 1.36) | 0.351 |  |
| Acquired immune deficiency syndrome |  |  |  |  |  |  |
| NO | 2252 (99.96) | 378/1413 | 191/839 | 0.79 (0.67 ~ 0.95) | **0.010** |  |
| YES | 1 (0.04) | 1/1 | 0/0 |  |  |  |
| Age |  |  |  |  |  | 0.230 |
| <82 | 1126 (49.98) | 159/696 | 80/430 | 0.70 (0.53 ~ 0.92) | **0.011** |  |
| >=82 | 1127 (50.02) | 220/718 | 111/409 | 0.85 (0.68 ~ 1.08) | 0.178 |  |
| Charlson comorbidity index |  |  |  |  |  | 0.510 |
| <=6 | 750 (33.29) | 83/463 | 39/287 | 0.66 (0.45 ~ 0.98) | **0.040** |  |
| >6 | 1503 (66.71) | 296/951 | 152/552 | 0.82 (0.67 ~ 1.00) | **0.048** |  |
| Heart Rate |  |  |  |  |  | 0.883 |
| <81 | 1094 (48.56) | 153/700 | 72/394 | 0.85 (0.64 ~ 1.13) | 0.266 |  |
| >=81 | 1159 (51.44) | 226/714 | 119/445 | 0.78 (0.62 ~ 0.98) | **0.032** |  |
| Respiratory Rate |  |  |  |  |  | 0.284 |
| <19 | 916 (40.66) | 122/566 | 61/350 | 0.66 (0.48 ~ 0.91) | **0.012** |  |
| >=19 | 1337 (59.34) | 257/848 | 130/489 | 0.84 (0.68 ~ 1.04) | 0.102 |  |
| Temperature |  |  |  |  |  | 0.920 |
| <36 8 | 1017 (45.14) | 182/652 | 86/365 | 0.77 (0.59 ~ 1.00) | 0.052 |  |
| >=36 8 | 1236 (54.86) | 197/762 | 105/474 | 0.76 (0.60 ~ 0.97) | **0.025** |  |
| Pulse oxygen saturation |  |  |  |  |  | 0.167 |
| <97 | 761 (33.78) | 111/475 | 67/286 | 0.90 (0.66 ~ 1.24) | 0.524 |  |
| >=97 | 1492 (66.22) | 268/939 | 124/553 | 0.74 (0.60 ~ 0.92) | **0.006** |  |
| White blood cell |  |  |  |  |  | 0.952 |
| <9 8 | 1120 (49.71) | 148/694 | 76/426 | 0.78 (0.59 ~ 1.04) | 0.088 |  |
| >=9 8 | 1133 (50.29) | 231/720 | 115/413 | 0.81 (0.64 ~ 1.02) | 0.067 |  |
| Hemoglobin |  |  |  |  |  | 0.716 |
| <9 85 | 1111 (49.31) | 204/715 | 93/396 | 0.81 (0.63 ~ 1.03) | 0.091 |  |
| >=9 85 | 1142 (50.69) | 175/699 | 98/443 | 0.78 (0.60 ~ 1.00) | 0.052 |  |
| Platelet |  |  |  |  |  | 0.864 |
| <193 | 1125 (49.93) | 197/706 | 96/419 | 0.77 (0.60 ~ 0.99) | **0.045** |  |
| >=193 | 1128 (50.07) | 182/708 | 95/420 | 0.82 (0.64 ~ 1.06) | 0.124 |  |
| Creatinine |  |  |  |  |  | 0.975 |
| <1 1 | 1029 (45.67) | 136/653 | 77/376 | 0.81 (0.61 ~ 1.08) | 0.152 |  |
| >=1 1 | 1224 (54.33) | 243/761 | 114/463 | 0.80 (0.64 ~ 1.00) | **0.049** |  |
| Blood urea nitrogen |  |  |  |  |  | 0.626 |
| <26 | 1107 (49.13) | 137/693 | 77/414 | 0.82 (0.61 ~ 1.09) | 0.166 |  |
| >=26 | 1146 (50.87) | 242/721 | 114/425 | 0.77 (0.62 ~ 0.97) | **0.025** |  |
| Potassium |  |  |  |  |  | 0.880 |
| <4 1 | 1001 (44.43) | 159/633 | 82/368 | 0.78 (0.60 ~ 1.03) | 0.079 |  |
| >=4 1 | 1252 (55.57) | 220/781 | 109/471 | 0.82 (0.65 ~ 1.04) | 0.102 |  |
| Sodium |  |  |  |  |  | 0.857 |
| <139 | 959 (42.57) | 150/592 | 85/367 | 0.82 (0.63 ~ 1.08) | 0.157 |  |
| >=139 | 1294 (57.43) | 229/822 | 106/472 | 0.76 (0.61 ~ 0.97) | **0.025** |  |
| Chloride |  |  |  |  |  | 0.935 |
| <103 | 1003 (44.52) | 149/615 | 79/388 | 0.78 (0.59 ~ 1.03) | 0.082 |  |
| >=103 | 1250 (55.48) | 230/799 | 112/451 | 0.74 (0.59 ~ 0.93) | **0.011** |  |
| Calcium |  |  |  |  |  | 0.201 |
| <8 4 | 979 (43.45) | 215/611 | 107/368 | 0.72 (0.57 ~ 0.92) | **0.008** |  |
| >=8 4 | 1274 (56.55) | 164/803 | 84/471 | 0.92 (0.71 ~ 1.20) | 0.550 |  |
| Glucose |  |  |  |  |  | 0.554 |
| <118 | 1087 (48.25) | 133/683 | 68/404 | 0.85 (0.63 ~ 1.14) | 0.279 |  |
| >=118 | 1166 (51.75) | 246/731 | 123/435 | 0.77 (0.62 ~ 0.96) | **0.021** |  |
| Bicarbonate |  |  |  |  |  | 0.571 |
| <25 | 950 (42.17) | 238/604 | 115/346 | 0.80 (0.64 ~ 1.00) | 0.050 |  |
| >=25 | 1303 (57.83) | 141/810 | 76/493 | 0.71 (0.53 ~ 0.95) | **0.020** |  |
| Lactate |  |  |  |  |  | 0.663 |
| <1 7 | 1056 (46.87) | 155/681 | 71/375 | 0.77 (0.58 ~ 1.02) | 0.071 |  |
| >=1 7 | 1197 (53.13) | 224/733 | 120/464 | 0.84 (0.67 ~ 1.05) | 0.119 |  |
| Sequential Organ Failure Assessment |  |  |  |  |  | 0.811 |
| <5 | 971 (43.10) | 107/619 | 47/352 | 0.76 (0.53 ~ 1.07) | 0.118 |  |
| >=5 | 1282 (56.90) | 272/795 | 144/487 | 0.82 (0.67 ~ 1.00) | 0.054 |  |
| Glasgow Coma Scale |  |  |  |  |  | 0.171 |
| <15 | 337 (14.96) | 69/206 | 33/131 | 0.64 (0.42 ~ 0.97) | **0.036** |  |
| 15 | 1916 (85.04) | 310/1208 | 158/708 | 0.85 (0.70 ~ 1.03) | 0.094 |  |
| HR: Hazard Ratio, CI: Confidence Interval, 0: DBP out of (51–57), 1: DBP in (51–57). | | | | | | |
