# Supplementary material for: Exploring the Optimal Range of Blood Pressure in Elderly Sepsis Patients: A Retrospective Study Based on MIMIC-IV Data
Source: Research Square preprint supplement (doi:10.21203/rs.3.rs-6011063/v1), 2025-02-18
Supplement: Supplementary file 4 [file a9fb70d5e271d1990ad8e26c.docx]

### The results of the subgroup analysis of the optimal range of mean arterial pressure

| Variables | n (%) | 0 | 1 | HR (95%CI) | *P* | P for interaction |
| --- | --- | --- | --- | --- | --- | --- |
|
| All patients | 2253 (100.00) | 397/1465 | 173/788 | 0.83 (0.69 ~ 0.99) | **0.044** |  |
| Gender |  |  |  |  |  | 0.654 |
| Female | 1086 (48.20) | 205/741 | 84/345 | 0.84 (0.65 ~ 1.09) | 0.193 |  |
| Male | 1167 (51.80) | 192/724 | 89/443 | 0.84 (0.64 ~ 1.08) | 0.173 |  |
| Myocardial infarct |  |  |  |  |  | 0.251 |
| NO | 1639 (72.75) | 276/1058 | 123/581 | 0.85 (0.68 ~ 1.06) | 0.144 |  |
| YES | 614 (27.25) | 121/407 | 50/207 | 0.75 (0.54 ~ 1.06) | 0.106 |  |
| Congestive heart failure |  |  |  |  |  | 0.149 |
| NO | 1296 (57.52) | 207/832 | 92/464 | 0.93 (0.72 ~ 1.19) | 0.553 |  |
| YES | 957 (42.48) | 190/633 | 81/324 | 0.69 (0.53 ~ 0.90) | **0.006** |  |
| Peripheral vascular disease |  |  |  |  |  | 0.105 |
| NO | 1835 (81.45) | 331/1178 | 140/657 | 0.78 (0.63 ~ 0.95) | **0.015** |  |
| YES | 418 (18.55) | 66/287 | 33/131 | 0.97 (0.62 ~ 1.52) | 0.894 |  |
| Cerebrovascular disease |  |  |  |  |  | 0.593 |
| NO | 1903 (84.47) | 316/1211 | 151/692 | 0.86 (0.71 ~ 1.05) | 0.139 |  |
| YES | 350 (15.53) | 81/254 | 22/96 | 0.67 (0.40 ~ 1.10) | 0.114 |  |
| Dementia |  |  |  |  |  | 0.020 |
| NO | 2103 (93.34) | 367/1375 | 151/728 | 0.77 (0.64 ~ 0.94) | **0.010** |  |
| YES | 150 (6.66) | 30/90 | 22/60 | 1.28 (0.70 ~ 2.35) | 0.422 |  |
| Chronic pulmonary disease |  |  |  |  |  | 0.806 |
| NO | 1588 (70.48) | 269/1021 | 119/567 | 0.82 (0.66 ~ 1.03) | 0.089 |  |
| YES | 665 (29.52) | 128/444 | 54/221 | 0.82 (0.59 ~ 1.15) | 0.252 |  |
| Rheumatic disease |  |  |  |  |  | 0.918 |
| NO | 2158 (95.78) | 376/1406 | 163/752 | 0.82 (0.68 ~ 1.00) | **0.045** |  |
| YES | 95 (4.22) | 21/59 | 10/36 | 1.20 (0.48 ~ 2.99) | 0.690 |  |
| Peptic ulcer disease |  |  |  |  |  | 0.656 |
| NO | 2174 (96.49) | 384/1413 | 161/761 | 0.82 (0.68 ~ 0.99) | **0.037** |  |
| YES | 79 (3.51) | 13/52 | 12/27 | 2.95 (0.97 ~ 8.96) | 0.056 |  |
| Mild liver disease |  |  |  |  |  | 0.365 |
| NO | 2095 (92.99) | 346/1354 | 153/741 | 0.85 (0.70 ~ 1.03) | 0.101 |  |
| YES | 158 (7.01) | 51/111 | 20/47 | 0.65 (0.37 ~ 1.15) | 0.137 |  |
| Diabetes without complications |  |  |  |  |  | 0.023 |
| NO | 1674 (74.30) | 295/1094 | 113/580 | 0.72 (0.58 ~ 0.89) | **0.003** |  |
| YES | 579 (25.70) | 102/371 | 60/208 | 1.15 (0.83 ~ 1.61) | 0.404 |  |
| Diabetes with complications |  |  |  |  |  | 0.287 |
| NO | 2061 (91.48) | 363/1338 | 156/723 | 0.80 (0.66 ~ 0.97) | **0.023** |  |
| YES | 192 (8.52) | 34/127 | 17/65 | 0.96 (0.51 ~ 1.78) | 0.887 |  |
| Paraplegia |  |  |  |  |  | 0.327 |
| NO | 2169 (96.27) | 369/1393 | 167/776 | 0.85 (0.71 ~ 1.03) | 0.094 |  |
| YES | 84 (3.73) | 28/72 | 6/12 | 0.67 (0.22 ~ 2.08) | 0.489 |  |
| Renal disease |  |  |  |  |  | 0.958 |
| NO | 1564 (69.42) | 252/1001 | 117/563 | 0.82 (0.66 ~ 1.03) | 0.091 |  |
| YES | 689 (30.58) | 145/464 | 56/225 | 0.81 (0.58 ~ 1.11) | 0.192 |  |
| Malignant cancer |  |  |  |  |  | 0.750 |
| NO | 1965 (87.22) | 317/1278 | 142/687 | 0.83 (0.68 ~ 1.02) | 0.070 |  |
| YES | 288 (12.78) | 80/187 | 31/101 | 0.75 (0.49 ~ 1.16) | 0.200 |  |
| Severe liver disease |  |  |  |  |  | 0.991 |
| NO | 2211 (98.14) | 383/1438 | 167/773 | 0.83 (0.69 ~ 1.00) | **0.047** |  |
| YES | 42 (1.86) | 14/27 | 6/15 | 2.90 (0.37 ~ 22.48) | 0.309 |  |
| Metastatic solid tumor |  |  |  |  |  | 0.142 |
| NO | 2155 (95.65) | 355/1401 | 156/754 | 0.80 (0.66 ~ 0.98) | **0.027** |  |
| YES | 98 (4.35) | 42/64 | 17/34 | 0.97 (0.52 ~ 1.79) | 0.921 |  |
| Acquired immune deficiency syndrome |  |  |  |  |  |  |
| NO | 2252 (99.96) | 396/1464 | 173/788 | 0.83 (0.69 ~ 1.00) | **0.046** |  |
| YES | 1 (0.04) | 1/1 | 0/0 |  |  |  |
| Age |  |  |  |  |  | 0.361 |
| <82 | 1126 (49.98) | 165/725 | 74/401 | 0.81 (0.61 ~ 1.08) | 0.149 |  |
| >=82 | 1127 (50.02) | 232/740 | 99/387 | 0.87 (0.68 ~ 1.10) | 0.250 |  |
| Charlson comorbidity index |  |  |  |  |  | 0.592 |
| <=6 | 750 (33.29) | 88/480 | 34/270 | 0.76 (0.50 ~ 1.15) | 0.195 |  |
| >6 | 1503 (66.71) | 309/985 | 139/518 | 0.85 (0.69 ~ 1.04) | 0.114 |  |
| Heart Rate |  |  |  |  |  | 0.875 |
| <81 | 1094 (48.56) | 156/715 | 69/379 | 0.89 (0.66 ~ 1.19) | 0.425 |  |
| >=81 | 1159 (51.44) | 241/750 | 104/409 | 0.82 (0.65 ~ 1.04) | 0.098 |  |
| Respiratory Rate |  |  |  |  |  | 0.467 |
| <19 | 916 (40.66) | 133/591 | 50/325 | 0.78 (0.56 ~ 1.09) | 0.151 |  |
| >=19 | 1337 (59.34) | 264/874 | 123/463 | 0.88 (0.71 ~ 1.10) | 0.264 |  |
| Temperature |  |  |  |  |  | 0.413 |
| <36 8 | 1017 (45.14) | 194/678 | 74/339 | 0.76 (0.58 ~ 1.01) | 0.059 |  |
| >=36 8 | 1236 (54.86) | 203/787 | 99/449 | 0.84 (0.66 ~ 1.07) | 0.163 |  |
| Pulse oxygen saturation |  |  |  |  |  | 0.317 |
| <97 | 761 (33.78) | 115/473 | 63/288 | 0.97 (0.71 ~ 1.34) | 0.867 |  |
| >=97 | 1492 (66.22) | 282/992 | 110/500 | 0.77 (0.61 ~ 0.96) | **0.021** |  |
| White blood cell |  |  |  |  |  | 0.394 |
| <9 8 | 1120 (49.71) | 161/727 | 63/393 | 0.89 (0.66 ~ 1.20) | 0.441 |  |
| >=9 8 | 1133 (50.29) | 236/738 | 110/395 | 0.80 (0.64 ~ 1.01) | 0.062 |  |
| Hemoglobin |  |  |  |  |  | 0.455 |
| <9 85 | 1111 (49.31) | 206/726 | 91/385 | 0.88 (0.68 ~ 1.13) | 0.313 |  |
| >=9 85 | 1142 (50.69) | 191/739 | 82/403 | 0.79 (0.61 ~ 1.04) | 0.091 |  |
| Platelet |  |  |  |  |  | 0.410 |
| <193 | 1125 (49.93) | 207/728 | 86/397 | 0.78 (0.60 ~ 1.02) | 0.066 |  |
| >=193 | 1128 (50.07) | 190/737 | 87/391 | 0.86 (0.67 ~ 1.12) | 0.271 |  |
| Creatinine |  |  |  |  |  | 0.190 |
| <1 1 | 1029 (45.67) | 143/670 | 70/359 | 0.92 (0.69 ~ 1.25) | 0.607 |  |
| >=1 1 | 1224 (54.33) | 254/795 | 103/429 | 0.74 (0.59 ~ 0.94) | **0.013** |  |
| Blood urea nitrogen |  |  |  |  |  | 0.036 |
| <26 | 1107 (49.13) | 142/714 | 72/393 | 1.10 (0.82 ~ 1.48) | 0.524 |  |
| >=26 | 1146 (50.87) | 255/751 | 101/395 | 0.70 (0.56 ~ 0.89) | **0.004** |  |
| Potassium |  |  |  |  |  | 0.779 |
| <4 1 | 1001 (44.43) | 169/675 | 72/326 | 0.84 (0.63 ~ 1.11) | 0.223 |  |
| >=4 1 | 1252 (55.57) | 228/790 | 101/462 | 0.83 (0.65 ~ 1.06) | 0.145 |  |
| Sodium |  |  |  |  |  | 0.943 |
| <139 | 959 (42.57) | 165/631 | 70/328 | 0.89 (0.66 ~ 1.19) | 0.417 |  |
| >=139 | 1294 (57.43) | 232/834 | 103/460 | 0.80 (0.63 ~ 1.01) | 0.064 |  |
| Chloride |  |  |  |  |  | 0.070 |
| <103 | 1003 (44.52) | 165/648 | 63/355 | 0.71 (0.53 ~ 0.96) | **0.026** |  |
| >=103 | 1250 (55.48) | 232/817 | 110/433 | 0.92 (0.73 ~ 1.16) | 0.464 |  |
| Calcium |  |  |  |  |  | 0.638 |
| <8 4 | 979 (43.45) | 226/654 | 96/325 | 0.77 (0.60 ~ 0.99) | **0.041** |  |
| >=8 4 | 1274 (56.55) | 171/811 | 77/463 | 0.92 (0.70 ~ 1.21) | 0.548 |  |
| Glucose |  |  |  |  |  | 0.347 |
| <118 | 1087 (48.25) | 148/712 | 53/375 | 0.71 (0.51 ~ 0.98) | **0.038** |  |
| >=118 | 1166 (51.75) | 249/753 | 120/413 | 0.88 (0.70 ~ 1.10) | 0.251 |  |
| Bicarbonate |  |  |  |  |  | 0.068 |
| <25 | 950 (42.17) | 243/642 | 110/308 | 0.92 (0.73 ~ 1.16) | 0.459 |  |
| >=25 | 1303 (57.83) | 154/823 | 63/480 | 0.65 (0.48 ~ 0.88) | **0.005** |  |
| Lactate |  |  |  |  |  | 0.393 |
| <1 7 | 1056 (46.87) | 151/680 | 75/376 | 0.90 (0.67 ~ 1.19) | 0.455 |  |
| >=1 7 | 1197 (53.13) | 246/785 | 98/412 | 0.78 (0.61 ~ 0.99) | **0.042** |  |
| Sequential Organ Failure Assessment |  |  |  |  |  | 0.774 |
| <5 | 971 (43.10) | 110/632 | 44/339 | 0.77 (0.54 ~ 1.11) | 0.159 |  |
| >=5 | 1282 (56.90) | 287/833 | 129/449 | 0.86 (0.69 ~ 1.06) | 0.160 |  |
| Glasgow Coma Scale |  |  |  |  |  | 0.235 |
| <15 | 337 (14.96) | 71/230 | 31/107 | 1.04 (0.67 ~ 1.62) | 0.849 |  |
| 15 | 1916 (85.04) | 326/1235 | 142/681 | 0.79 (0.65 ~ 0.97) | **0.026** |  |
| HR: Hazard Ratio, CI: Confidence Interval, 0: MAP out of (69–74), 1: MAP in (69–74). | | | | | | |
