# Supplementary material for: Exploring the Optimal Range of Blood Pressure in Elderly Sepsis Patients: A Retrospective Study Based on MIMIC-IV Data
Source: Research Square preprint supplement (doi:10.21203/rs.3.rs-6011063/v1), 2025-02-18
Supplement: Supplementary file 5 [file d56f1f5f716c070531f41825.docx]

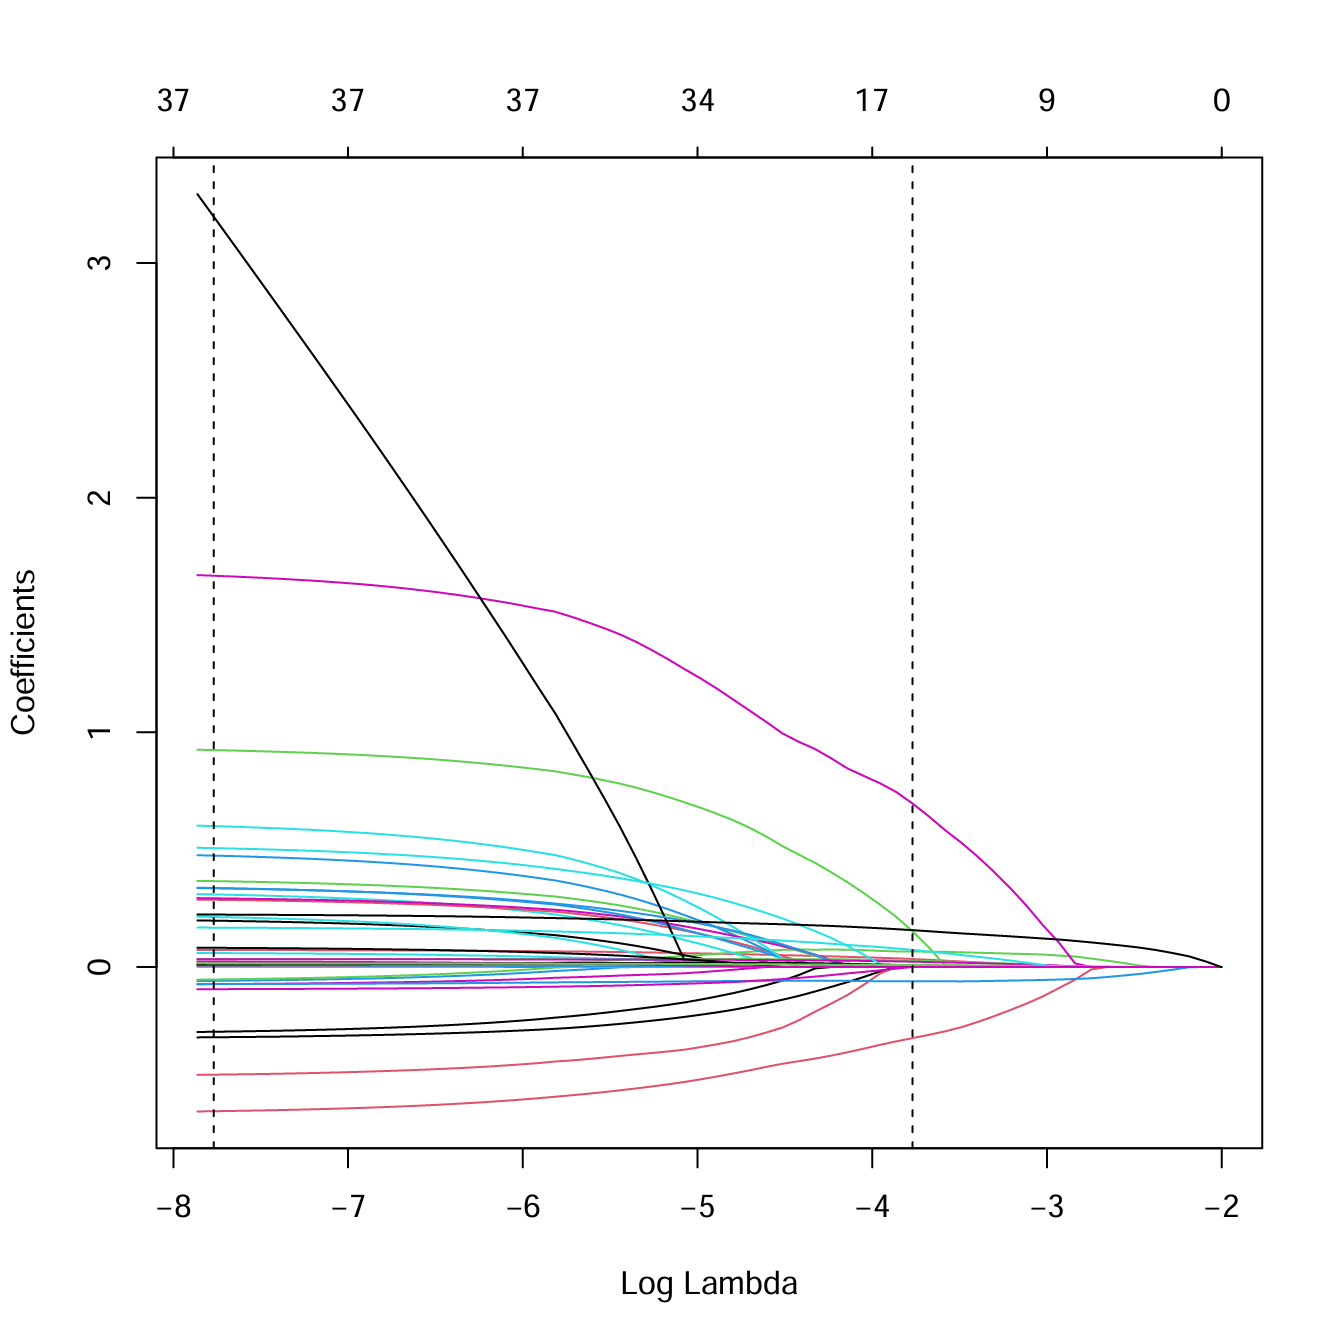

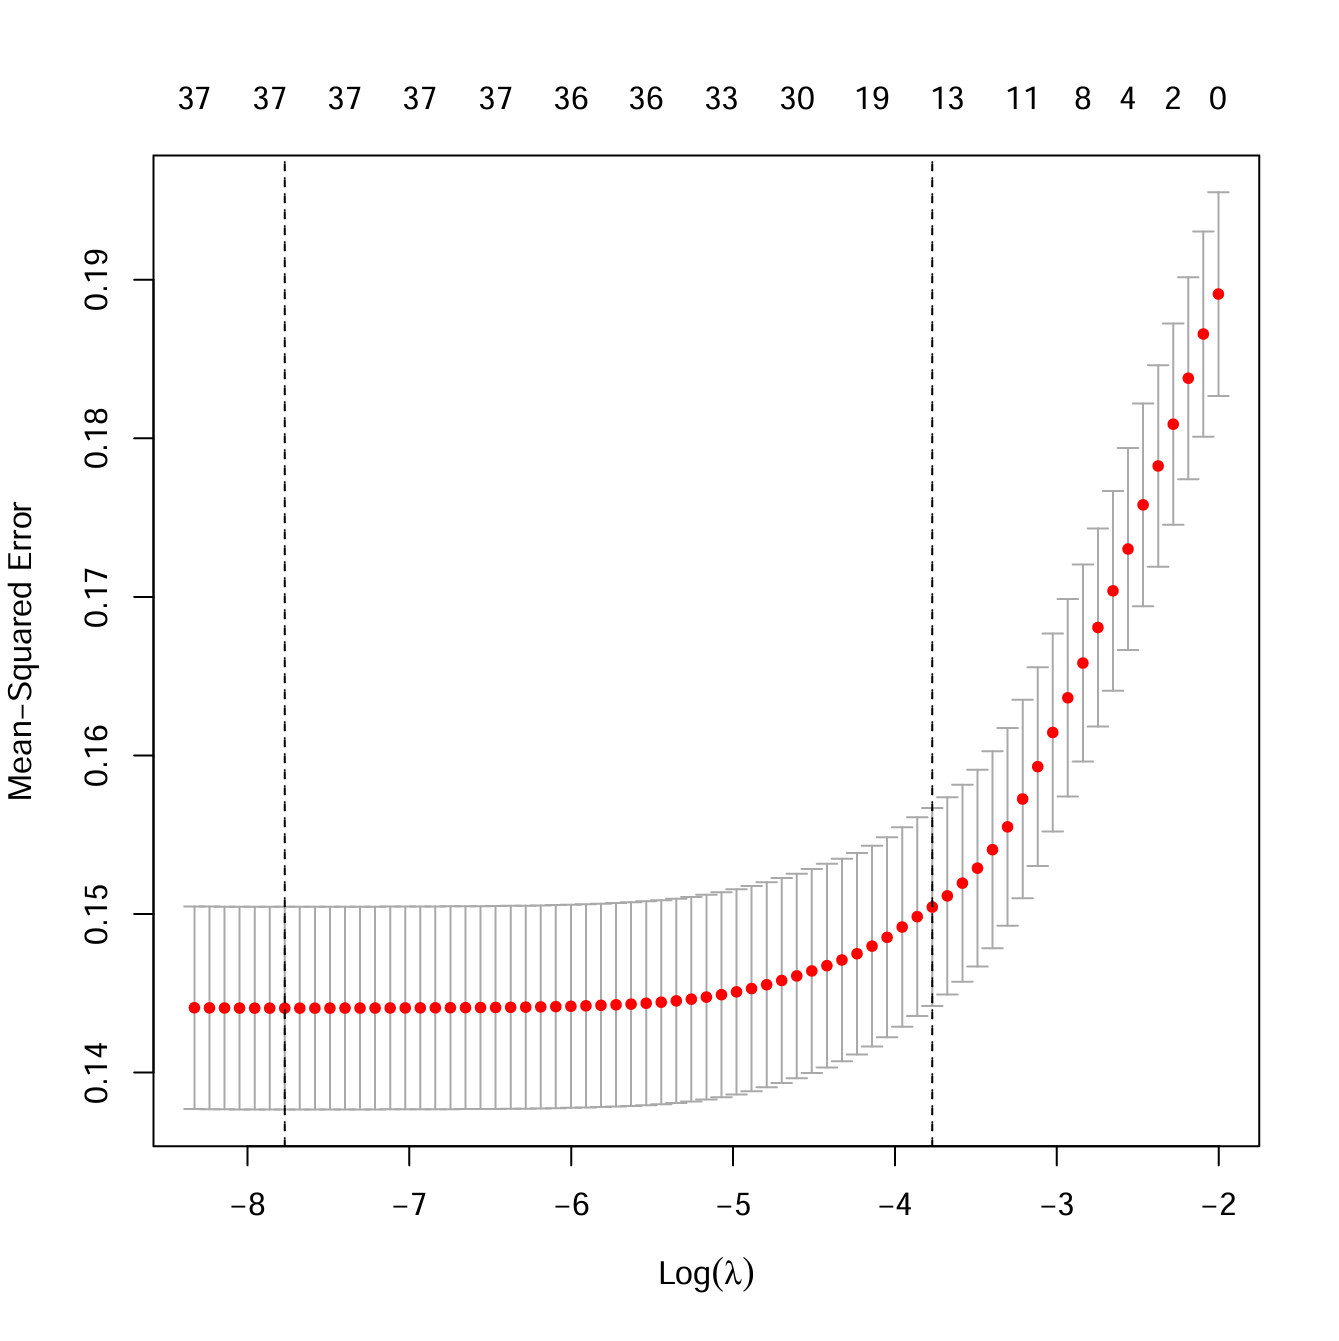


**B**

**A**

Appendix FIGURE 1

Lasso regression was used to screen the variables. **A**. The process of selecting the most appropriate λ in the LASSO model using 10-fold cross-validation shows that as the log lambda value increases, the penalty to the model increases, resulting in fewer characteristic variables being included in the model. **B**. The dashed line on the left of (B) marks the inclusion of independent variables in the minimal model, while the dashed line on the right marks the inclusion of independent variables in the streamlined model.
