# Supplementary material for: Exploring the Optimal Range of Blood Pressure in Elderly Sepsis Patients: A Retrospective Study Based on MIMIC-IV Data
Source: Research Square preprint supplement (doi:10.21203/rs.3.rs-6011063/v1), 2025-02-18
Supplement: Supplementary file 6 [file db41e0dfd15b0b2aa60f78d8.docx]

Appendix TABLE 1 Baseline characteristics of patients with sepsis.

|  | **ALL** | **Survival** | **Death** | **P** | **Non-Atrial fibrillation** | **Atrial fibrillation** | **P** |
| --- | --- | --- | --- | --- | --- | --- | --- |
|  | ***N=2253*** | ***N=1737*** | ***N=516*** |  | ***N=1166*** | ***N=1087*** |  |
| **Demographic** |  |  |  |  |  |  |  |
| Gender,M (n(%)) | 1167 (51.8%) | 915 (52.7%) | 252 (48.8%) | 0.138 | 594 (50.9%) | 573 (52.7%) | 0.425 |
| Age (years) (median [IQR]) | 81.8 [78.2;85.8] | 81.6 [78.1;85.5] | 82.6 [78.5;87.0] | 0.005 | 81.7 [78.1;86.2] | 81.8 [78.2;85.6] | 0.543 |
| **Coexisting illness (n(%))** |  |  |  |  |  |  |  |
| Myocardial infarct | 614 (27.3%) | 452 (26.0%) | 162 (31.4%) | 0.019 | 314 (26.9%) | 300 (27.6%) | 0.757 |
| Congestive heart failure | 957 (42.5%) | 709 (40.8%) | 248 (48.1%) | 0.004 | 466 (40.0%) | 491 (45.2%) | 0.014 |
| Peripheral vascular disease | 418 (18.6%) | 320 (18.4%) | 98 (19.0%) | 0.820 | 204 (17.5%) | 214 (19.7%) | 0.200 |
| Cerebrovascular disease | 350 (15.5%) | 253 (14.6%) | 97 (18.8%) | 0.024 | 166 (14.2%) | 184 (16.9%) | 0.088 |
| Dementia | 150 (6.66%) | 111 (6.39%) | 39 (7.56%) | 0.404 | 93 (7.98%) | 57 (5.24%) | 0.012 |
| Chronic pulmonary disease | 665 (29.5%) | 497 (28.6%) | 168 (32.6%) | 0.095 | 323 (27.7%) | 342 (31.5%) | 0.056 |
| Rheumatic disease | 95 (4.22%) | 68 (3.91%) | 27 (5.23%) | 0.237 | 47 (4.03%) | 48 (4.42%) | 0.727 |
| Peptic ulcer disease | 79 (3.51%) | 58 (3.34%) | 21 (4.07%) | 0.512 | 38 (3.26%) | 41 (3.77%) | 0.585 |
| Mild liver disease | 158 (7.01%) | 88 (5.07%) | 70 (13.6%) | <0.001 | 82 (7.03%) | 76 (6.99%) | 1.000 |
| Diabetes without complications | 579 (25.7%) | 438 (25.2%) | 141 (27.3%) | 0.365 | 314 (26.9%) | 265 (24.4%) | 0.181 |
| Diabetes with complications | 192 (8.52%) | 146 (8.41%) | 46 (8.91%) | 0.784 | 118 (10.1%) | 74 (6.81%) | 0.006 |
| Paraplegia | 84 (3.73%) | 52 (2.99%) | 32 (6.20%) | 0.001 | 51 (4.37%) | 33 (3.04%) | 0.118 |
| Renal disease | 689 (30.6%) | 503 (29.0%) | 186 (36.0%) | 0.003 | 354 (30.4%) | 335 (30.8%) | 0.849 |
| Malignant cancer | 288 (12.8%) | 189 (10.9%) | 99 (19.2%) | <0.001 | 175 (15.0%) | 113 (10.4%) | 0.001 |
| Severe liver disease | 42 (1.86%) | 24 (1.38%) | 18 (3.49%) | 0.003 | 21 (1.80%) | 21 (1.93%) | 0.941 |
| Metastatic solid tumor | 98 (4.35%) | 50 (2.88%) | 48 (9.30%) | <0.001 | 62 (5.32%) | 36 (3.31%) | 0.026 |
| Acquired immune deficiency syndrome | 1 (0.04%) | 0 (0.00%) | 1 (0.19%) | 0.229 | 0 (0.00%) | 1 (0.09%) | 0.482 |
| Charlson comorbidity index (median [IQR]) | 6.00 [5.00;8.00] | 6.00 [5.00;8.00] | 7.00 [6.00;9.00] | <0.001 | 6.00 [5.00;8.00] | 6.00 [5.00;8.00] | 0.319 |
| **Vital sign (median [IQR])** |  |  |  |  |  |  |  |
| Heart Rate (bpm) | 81.0 [74.0;89.5] | 80.0 [74.0;88.0] | 84.0 [76.0;94.0] | <0.001 | 80.0 [73.0;88.0] | 82.0 [76.0;90.0] | <0.001 |
| Systolic blood pressure (mmHg) | 114 [107;123] | 116 [109;124] | 110 [104;119] | <0.001 | 114 [107;123] | 115 [107;124] | 0.196 |
| Diastolic blood pressure (mmHg) | 54.0 [50.0;59.0] | 54.5 [50.0;59.0] | 53.0 [48.0;58.0] | <0.001 | 53.0 [49.0;58.0] | 55.0 [51.0;60.0] | <0.001 |
| Mean arterial pressure (mmHg) | 72.0 [68.0;76.0] | 72.0 [68.0;77.0] | 70.0 [66.0;75.0] | <0.001 | 71.0 [67.0;75.0] | 73.0 [68.0;77.5] | <0.001 |
| Respiratory Rate (bpm) | 19.0 [17.0;22.0] | 19.0 [17.0;21.0] | 21.0 [18.0;23.1] | <0.001 | 19.0 [17.0;22.0] | 20.0 [18.0;22.0] | 0.002 |
| Temperature (℃) | 36.8 [36.6;37.0] | 36.8 [36.6;37.0] | 36.8 [36.6;37.2] | 0.054 | 36.8 [36.6;37.0] | 36.8 [36.6;37.0] | 0.965 |
| Pulse oxygen saturation (%) | 97.0 [96.0;98.0] | 97.0 [96.0;98.0] | 98.0 [96.0;99.0] | 0.002 | 97.0 [96.0;99.0] | 97.0 [96.0;98.0] | 0.132 |
| **Laboratory parameters (median [IQR])** |  |  |  |  |  |  |  |
| White blood cell (×109 /L) | 9.80 [7.90;12.2] | 9.50 [7.80;11.7] | 11.2 [8.60;14.7] | <0.001 | 9.50 [7.70;11.9] | 10.2 [8.20;12.6] | <0.001 |
| Hemoglobin (g/dL) | 9.85 [9.00;10.8] | 9.90 [9.10;10.8] | 9.70 [8.80;10.7] | 0.002 | 9.80 [9.00;10.8] | 9.90 [9.15;10.8] | 0.093 |
| Platelet (×109 /L) | 193 [143;252] | 194 [146;251] | 186 [124;256] | 0.003 | 197 [144;257] | 188 [140;247] | 0.063 |
| Creatinine (mg/dL) | 1.10 [0.80;1.60] | 1.10 [0.80;1.50] | 1.30 [0.90;2.00] | <0.001 | 1.10 [0.80;1.55] | 1.15 [0.90;1.65] | 0.015 |
| Blood urea nitrogen (mg/dL) | 26.0 [19.0;38.0] | 25.0 [18.5;35.0] | 31.0 [21.0;46.0] | <0.001 | 25.0 [18.0;36.0] | 27.0 [20.0;39.0] | <0.001 |
| Potassium (mmol/L) | 4.10 [3.90;4.30] | 4.10 [3.90;4.30] | 4.10 [3.90;4.40] | 0.003 | 4.10 [3.90;4.30] | 4.10 [3.90;4.30] | 0.998 |
| Sodium (mmol/L) | 139 [137;141] | 139 [137;141] | 139 [137;142] | 0.611 | 139 [137;141] | 139 [137;141] | 0.032 |
| Chloride (mmol/L) | 103 [100;106] | 103 [100;105] | 104 [100;108] | 0.001 | 104 [101;106] | 103 [100;105] | <0.001 |
| Calcium (mmol/L) | 8.40 [8.10;8.80] | 8.50 [8.15;8.80] | 8.20 [7.85;8.70] | <0.001 | 8.40 [8.00;8.80] | 8.50 [8.10;8.80] | 0.012 |
| Glucose (mg/dL) | 118 [105;138] | 116 [104;133] | 129 [113;154] | <0.001 | 118 [104;138] | 119 [106;138] | 0.186 |
| Bicarbonate (mmol/L) | 25.0 [23.0;27.0] | 25.5 [24.0;27.0] | 23.0 [20.0;26.0] | <0.001 | 25.0 [23.0;27.0] | 25.0 [23.0;27.0] | 0.026 |
| Lactate (mmol/L) | 1.70 [1.30;2.30] | 1.70 [1.30;2.20] | 1.85 [1.40;2.80] | <0.001 | 1.70 [1.30;2.25] | 1.75 [1.35;2.35] | 0.029 |
| **Critical illness scoring systems (median [IQR])** |  |  |  |  |  |  |  |
| Glasgow Coma Scale | 15.0 [15.0;15.0] | 15.0 [15.0;15.0] | 15.0 [15.0;15.0] | 0.784 | 15.0 [15.0;15.0] | 15.0 [15.0;15.0] | 0.026 |
| Sequential Organ Failure Assessment | 5.00 [4.00;7.00] | 5.00 [3.00;6.00] | 7.00 [4.00;9.00] | <0.001 | 5.00 [4.00;7.00] | 5.00 [3.00;7.00] | 0.262 |
| **Clinical treatment information** |  |  |  |  |  |  |  |
| Renal Replacement Therapy (n(%)) | 251 (11.1%) | 138 (7.94%) | 113 (21.9%) | <0.001 | 115 (9.86%) | 136 (12.5%) | 0.054 |
| Mechanical Ventilation (n(%)) | 1803 (80.0%) | 1361 (78.4%) | 442 (85.7%) | <0.001 | 883 (75.7%) | 920 (84.6%) | <0.001 |
| Acute Kidney Injury (KDIGO-stage3) (n(%)) | 811 (36.0%) | 482 (27.7%) | 329 (63.8%) | <0.001 | 395 (33.9%) | 416 (38.3%) | 0.033 |
| Length of hospital stays (days) (median [IQR]) | 10.1 [6.62;16.3] | 10.7 [7.10;16.6] | 8.67 [5.11;15.6] | <0.001 | 9.18 [6.12;14.8] | 11.1 [7.32;18.0] | <0.001 |
| Length of ICU stays (days) (median [IQR]) | 4.79 [3.11;8.67] | 4.29 [3.01;7.76] | 6.64 [4.03;11.2] | <0.001 | 4.02 [2.73;7.06] | 5.87 [3.57;10.1] | <0.001 |
| Atrial fibrillation (n(%)) | 1087 (48.2%) | 815 (46.9%) | 272 (52.7%) | 0.024 |  |  |  |
| In-hospital mortality, (n (%)) | 516 (22.9%) |  |  |  | 244 (20.9%) | 272 (25.0%) | 0.024 |
| 28-day mortality, (n (%)) | 570 (25.3%) | 92 (5.30%) | 478 (92.6%) | 0.000 | 298 (25.6%) | 272 (25.0%) | 0.808 |
